# Supplementary material for: ZBTB20 regulates WNT/CTNNB1 signalling pathway by suppressing PPARG during hepatocellular carcinoma tumourigenesis
Source: PubMed Central journal article supplement — JHEP Rep. 2020 Dec 19;3(2):100223. doi: 10.1016/j.jhepr.2020.100223 (PMC7873381; doi:10.1016/j.jhepr.2020.100223), 2020-12-19
Supplement: mmc2.pdf [file mmc2.pdf]

## JHEP Reports

### CTAT methods

Tables for a “Complete, Transparent, Accurate and Timely account” (CTAT) are now mandatory for all revised submissions. The aim is to enhance the reproducibility of methods.

- Only include the parts relevant to your study
- Refer to the CTAT in the main text as ‘Supplementary CTAT Table’
- Do not add subheadings
- Add as many rows as needed to include all information
- Only include one item per row

**If the CTAT form is not relevant to your study, please outline the reasons why:**

N.A.

#### 1.1 Antibodies

| Name          | Citation | Supplier                        | Cat no. | Clone no. |
|---------------|----------|---------------------------------|---------|-----------|
| Ki67          |          | Abcam                           | Ab15580 |           |
| Total CTNNB1  |          | Cell Signaling Technology (CST) | 8480    |           |
| Flag          |          | Sigma-Aldrich                   | F3165   |           |
| Active CTNNB1 |          | CST                             | 8814    |           |
| PPARG         |          | CST                             | 2435S   |           |
| ACTB          |          | TransGen Biotech                | HC201   |           |

#### 1.2 Cell lines

| Name      | Citation | Supplier | Cat no.  | Passage no. | Authentication test method |
|-----------|----------|----------|----------|-------------|----------------------------|
| HHL7      | 18       |          |          | From 10-20  | RT-PCR                     |
| PLC/PRF/5 |          | ATCC     | TCP-1011 | From 10-20  |                            |
| Hep3B     |          | ATCC     | TCP-1011 | From 10-20  |                            |
| C3A       |          | ATCC     | TCP-1011 | From 10-20  |                            |

#### 1.3 Organisms

| Name     | Citation      | Supplier                         | Strain              | Sex  | Age             | Overall n number |
|----------|---------------|----------------------------------|---------------------|------|-----------------|------------------|
| Fah/SB11 | 11, 12, 15-17 | University of Minnesota, MN, USA | Mixed C57BL/6 X 129 | Male | 160 to 200-days | 17               |

#### 1.4 Sequence based reagents

| Name | Sequence | Supplier |
|------|----------|----------|
|------|----------|----------|

|                     |                           |                        |
|---------------------|---------------------------|------------------------|
| Afp-For (RT-PCR)    | CCTGTGAACTCTGGTATCAG      | Life Technologies (LT) |
| Afp-Rev (RT-PCR)    | GCTCACACCAAAGCGTCAAC      | LT                     |
| Spp1-For (RT-PCR)   | CTTTCACCTCCAATCGTCCCTAC   | LT                     |
| Spp1-Rev (RT-PCR)   | GCTCTCTTTGGAATGCTCAAGT    | LT                     |
| Actb-For (RT-PCR)   | GTGACGAGGCCAGAGCAAGAG     | LT                     |
| Actb-Rev (RT-PCR)   | AGGGGCCGGACTCATCGTACTC    | LT                     |
| Fah-For (RT-PCR)    | ATGAGCTTTATTCCAGTGGCC     | LT                     |
| Fah-Rev (RT-PCR)    | ACCACAATGGAGGAAGCTCG      | LT                     |
| SB11-For (RT-PCR)   | ATGGGAAAATCAAAGAAATCAGCC  | LT                     |
| SB11-Rev (RT-PCR)   | CGCACCAAAGTACGTTTCATCTCTA | LT                     |
| Zbtb20-For (RT-PCR) | ATGAGATTACTCAGCCGGGCGGATC | LT                     |
| Zbtb20-Rev (RT-PCR) | AGCTTGTCTTGGAAGAAGGGGCTGC | LT                     |
| ZBTB20-For (RT-PCR) | CGAGCGCATTACAGCATCAACCTT  | LT                     |
| ZBTB20-Rev (RT-PCR) | TCTCGATGTCGCTGTAGCCAAGCAG | LT                     |
| Actb-For (qPCR)     | TCCAGCCTTCCTTCTTGGGTATGGA | LT                     |
| Actb-Rev (qPCR)     | CGCAGCTCAGTAACAGTCCGCC    | LT                     |
| Axin-For (qPCR)     | ATGAGTAGCGCCGTGTTAGTG     | LT                     |
| Axin-Rev (qPCR)     | GGGCATAGGTTTGGTGGACT      | LT                     |
| Ccnd1-For (qPCR)    | CAGAAGTGCGAAGAGGAGGTC     | LT                     |
| Ccnd1-Rev (qPCR)    | TCATCTTAGAGGCCACGAACAT    | LT                     |
| Ctnnb1-For (qPCR)   | ATGGAGCCGGACAGAAAAGC      | LT                     |
| Ctnnb1-Rev (qPCR)   | CTTGCCACTCAGGGAAGGA       | LT                     |
| Lef1-For (qPCR)     | TGTTTATCCCATCACGGGTGG     | LT                     |
| Lef1-Rev (qPCR)     | CATGGAAGTGTGCGCTGACAG     | LT                     |
| Myc-For (qPCR)      | ATGCCCTCAACGTGAACTTC      | LT                     |
| Myc-Rev (qPCR)      | CGGAGTCGTAGTCGAGGTCATA    | LT                     |
| Tcf7-For (qPCR)     | AGCTTTCTCCACTCTACGAACA    | LT                     |
| Tcf7-Rev (qPCR)     | AATCCAGAGAGATCGGGGGTC     | LT                     |
| Gapdh-For (qPCR)    | GTGTTCTACCCCAATGTGT       |                        |
| Gapdh-Rev (qPCR)    | GAGACAACCTGGTCCTCAGTGT    |                        |
| ACTB-For (qPCR)     | GCCGTCTTCCCCTCCATCGT      | LT                     |
| ACTB-Rev (qPCR)     | TGCTCTGGGCCTCGTCGC        | LT                     |
| AXIN2-For (qPCR)    | CTCCCCACCTTGAATGAAGA      | LT                     |
| AXIN2-Rev (qPCR)    | TGGCTGGTGCAAAGACATAG      | LT                     |
| AFP-For (qPCR)      | CTTTGGGCTGCTCGCTATGA      | LT                     |
| AFP-Rev (qPCR)      | GCATGTTGATTTAAACAAGCTGCT  | LT                     |
| PPARG-For (qPCR)    | ACCAAAGTGCAATCAAAGTGGA    | LT                     |
| PPARG-Rev (qPCR)    | ATGAGGGAGTTGGAAGGCTCT     | LT                     |

|                    |                                    |    |
|--------------------|------------------------------------|----|
| CTNNB1-For (qPCR)  | AAAGCGGCTGTTAGTCACTGG              | LT |
| CTNNB1-Rev (qPCR)  | CGAGTCATTGCATACTGTCCAT             | LT |
| ZBTB20-For (qPCR)  | CGAGCGCATTACAGCATCAACCTT           | LT |
| ZBTB20-Rev (qPCR)  | TCTCGATGTCGCTGTAGCCAAGCAG          | LT |
| CCND1-For (qPCR)   | GCTGCGAAGTGGAAACCATC               | LT |
| CCND1-Rev (qPCR)   | CCTCCTTCTGCACACATTTGAA             | LT |
| GSK3B-For (qPCR)   | TCGAGAGCTCCAGATCATGAGAA            | LT |
| GSK3B-Rev (qPCR)   | CGGAACATAGTCCAGCACCAGA             | LT |
| APC-For (qPCR)     | AAAACGAGCACAGCGAAGAATAGC           | LT |
| APC-Rev (qPCR)     | TCGTGTAGTTGAACCCTGACCAT            | LT |
| PPARG Promoter-For | GGTACCCACTCATGTGACAAGACCTGCTCC     | LT |
| GAPDH-For (qPCR)   | GTCTCCTCTGACTTCAACAGCG             | LT |
| GAPDH-Rev (qPCR)   | ACCACCCTGTTGCTGTAGCCAA             | LT |
| PPARG Promoter-Rev | GCTAGCAGCATGGAATAGGGGTTTGCTGTAATTC | LT |
| ZBTB20 gRNA1       | CAGCGACATCGATCCCGTCGG              | LT |
| ZBTB20 gRNA2       | CGTGCTACGGGTCTCGCAGTCGG            | LT |
| ZBTB20 gRNA3       | AACAGAACTACGTCAAGCATGG             | LT |
| ZBTB20 gRNA4       | AACCGCGAGGAAGAGGAATTAGG            | LT |
| ZBTB20 gRNA5       | GTGTAGTATCTGCAACAAGCTGG            | LT |
| Scramble gRNA      | CATTTCTCAGTGCTATAGA                | LT |
| ZTBT20 Primer 1    | CGAGCGCATTACAGCATCAACCTT           | LT |
| ZTBT20 Primer 2    | GAACACATCGCCCACGTTCT               | LT |
| ZTBT20 Primer 3    | CCGCCAAACAGAACTACGTC               | LT |
| ZTBT20 Primer 4    | CCAGGAGGGTCTTGTGAGAGA              | LT |
| ZTBT20 Primer 5    | CAGCCCTCTTCACTACCCAG               | LT |
| Flag-Tagged        | GACTACAAAGACGATGACGACAAG           | LT |

## 1.5 Biological samples

| Description | Source | Identifier |
|-------------|--------|------------|
| N.A.        |        |            |

## 1.6 Deposited data

| Name of repository | Identifier | Link |
|--------------------|------------|------|
| N.A.               |            |      |

## 1.7 Software

| Software name  | Manufacturer           | Version |
|----------------|------------------------|---------|
| ImageJ         | NIH, Maryland, USA     | 1.40J   |
| Prism Software | GraphPad Software Inc. | 5       |

## 1.8 Other (e.g. drugs, proteins, vectors etc.)

|                                         |                          |              |
|-----------------------------------------|--------------------------|--------------|
| pKT2/GD-Empty                           | Citation 16              |              |
| pT2/GD-IRES-GFP                         | Citation 12              |              |
| pT2/shp53                               | Citations 11, 12, 15, 16 |              |
| ZBTB20 transcript variant 1 (isoform 1) | OriGene                  | NM_001164342 |
| ZBTB20 transcript variant 2 (isoform 2) | OriGene                  | NM_015642.2  |
| pPB/SB-DEST-GFP                         | Citation 19              |              |
| Cas9 (pSpCas9(BB)-2A-Puro (PX459) V2.0  | Addgene                  | 62988        |
| M50 Super 8x TOP-Flash                  | Addgene                  | 12456        |
| M51 Super 8x FOP-Flash                  | Addgene                  | 12457        |
| NTBC drug                               | Swedish Orphan Biovitrum |              |

## 1.9 Please provide the details of the corresponding methods author for the manuscript:

Name: Dr Vincent W. Keng  
 Address: Room 803, Y Block, Lee Shau Kee Building, Department of Applied Biology and Chemical Technology, The Hong Kong Polytechnic University, 11 Yuk Choi Road, Hung Hom, Kowloon, Hong Kong SAR.  
 Tel: +852-3400-8728  
 Fax: +852-2364-9932  
 Email: vincent.keng@polyu.edu.hk

## 2.0 Please confirm for randomised controlled trials all versions of the clinical protocol are included in the submission. These will be published online as supplementary information.

N.A.
